# Supplementary material for: Ground-Based Atmospheric Measurements at the Onsala Space Observatory (Sweden): Data & Trends (2009–2025)
Source: Copernicus journal article supplement (doi:10.5194/essd-2025-487), 2025-10-24
Supplement: Supplementary file [file essd-2025-487-RC1-supplement.pdf]

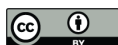

# Ground-Based Atmospheric Measurements at the Onsala Space Observatory (Sweden): Data & Trends (2009–2025)

Faustine Mascout<sup>1</sup>, Roger Hammargren<sup>1</sup>, and Peter Forkman<sup>1</sup>

<sup>1</sup>Onsala Space Observatory, Chalmers University of Technology, Onsala, Sweden

**Correspondence:** Faustine Mascout (faustine.mascout@chalmers.se)

**Abstract.** This study presents a comprehensive long-term dataset of ground-based atmospheric observations collected at the Onsala Space Observatory (OSO), Sweden, between August 2009 and April 2025. The dataset includes measurements of temperature, relative humidity, atmospheric pressure, precipitations, wind speed, gust and direction, and solar irradiance. It offers high-resolution insight into local weather patterns and seasonal variations, making it a valuable resource for climate monitoring and regional environmental studies. Preliminary analysis reveals a warming trend of  $\sim 0.15^{\circ}\text{C.yr}^{-1}$ , with significant seasonal contrasts: the most pronounced increase occurs in winter (203.3% above the annual trend, so winters are becoming milder), followed by autumn (80.1%), spring (62.3%), and summer (32.9%). Precipitation trends show a significant decrease over the study period. Anomalies such as the particularly cold winters in 2009-2010 and 2010-2011 or the particularly warm winter in 2019-2020 are highlighted and linked with the North Atlantic Oscillation (NAO) phases. This dataset complements existing data for local trend analysis and atmospheric modeling in northern Europe.

## 1 Introduction

In recent years, the scientific community has increasingly recognized the value of long-term, high-quality ground-based measurements to capture the nuances of surface processes and atmospheric interactions. Such datasets not only support the development and refinement of geophysical models but also enhance the reproducibility and consistency of climate research.

Understanding local expressions of climate variability further depends on sustained, high-resolution observations of key atmospheric parameters. In situ ground-based measurements, with their ability to capture local-scale processes, diurnal cycles, and extreme events at high temporal resolution, offer critical insights that complement satellite and reanalysis datasets (Ménard et al., 2019). While extensive observational networks exist across Northern Europe, high-frequency, multi-variable datasets covering more than a decade are still relatively uncommon - especially in coastal and maritime regions, where climate variability is strongly modulated by the interaction of oceanic and continental air masses.

The Onsala Space Observatory (OSO), situated on Sweden's west coast, provides a valuable multi-year record of key near-surface atmospheric parameters. These include air temperature, relative humidity, atmospheric pressure, wind (speed, gusts, direction), precipitation (rate and accumulations), and solar irradiance. Each of these variables plays a central role in the energy and water cycles of the atmosphere and is directly relevant to climate monitoring. For example, temperature and humidity are fundamental indicators of thermodynamic state and climate change (Douville et al., 2021); wind patterns influence regional

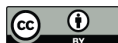

heat and moisture transport (Donat et al., 2010); precipitation and its intensity determine hydrological extremes and flood risks (Trenberth, 2011); solar irradiance governs surface energy balance and is critical for both climate models and renewable energy assessments (Wild et al., 2015); and atmospheric pressure provides insight into synoptic-scale circulation patterns.

This descriptive paper does not aim to introduce novel findings but rather to provide valuable data and offer an overview of the potential insights that such a dataset can yield. Although the measurements presented are local, the analysis demonstrates their relevance and potential utility for more advanced atmospheric or climate research conducted at broader spatial and temporal scales. In the present paper, the context in which the measurements were taken, as well as a brief presentation of the dataset and the instruments, are provided in Section 2. An initial analysis (time series and seasonal behaviour) of this dataset is presented in Section 4. Finally, Section 5 shows the inter-annual trends of the various measured parameters, and the first conclusions are presented in Section 6.

## 2 Study area and instrumentation

### 2.1 Study area – The Onsala Space observatory (OSO)

The Onsala Space Observatory (OSO), located 45 km south of Gothenburg in western Sweden, operates multiple geodetic and geophysical facilities since 1979, including Very Long Baseline Interferometry radio telescopes, a superconducting gravimeter, Global Navigation Satellite System stations, tide gauges, and many others (e.g. Haas et al., 2023; Varenius et al., 2021; Scherneck et al., 2020; Ning and Elgered, 2025, ...). An overview of the observatory with the instrument locations is depicted in Figure 1. Instruments used in this study are highlighted in red. The OSO has a strategic location on the west coast of southern Sweden at the land/sea interface. Land coverage is characterized by grassland, forest and sea (see photos in Fig.1).

The OSO atmospheric measurements are influenced by both local and large-scale phenomena. Indeed, Lepy and Pasanen (2017) show that the position of Northern Europe between the ocean and the continent and between the tropical and polar regions favours the confluence of multiple air masses (Fig.1 top left, adapted from Lepy and Pasanen, 2017). Thus, the OSO is a meeting place for the maritime Polar (mP) air masses, the maritime Tropical (mT) air masses, the continental Polar (cP) air masses; the maritime Arctic (mA) air masses responsible for the coldness from February to the arrival of the spring; and the continental Arctic (cA) air masses starting in the autumn. In this map, we can thus see that, depending on the seasons and atmospheric movements, Sweden can be subject to different regimes/air masses. Each of the later has specific thermodynamic properties: they can be warm or cold, bring humidity or, on the contrary, dry out the atmospheric layers. For example, the maritime Polar air masses bring cold and moist air from south of Greenland, and the maritime Tropical air masses imply warm and moist air that is important for the energy transfer from the warm Atlantic waters to Northern Europe. Sweden, and in our specific case the OSO, is at the crossroads of these air masses.

Large-scale pressure patterns such as the North Atlantic Oscillation (NAO) further modulate our region's winter climate. During boreal winter (November–April), the NAO manifests as a north–south dipole between the Azores High and the Icelandic Low. Appendix A shows the monthly NAO indices (Fig. A1) as well as the impact of the NAO phases on the Swedish West coast weather conditions, depending on the seasons (Table A1). In its positive phase, strengthened westerlies channel mild, moist

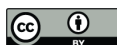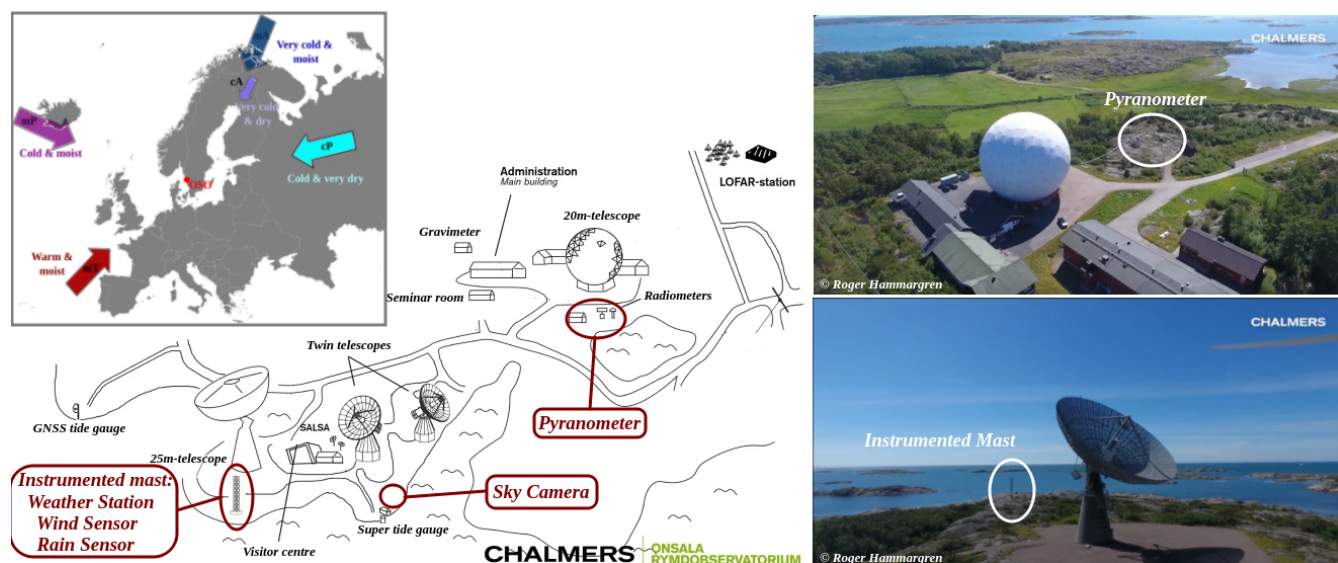

**Figure 1.** Locations and geographical context of the different measurements made at the OSO. Top left: Large-scale map and main air masses. Center: OSO map with instrument locations (atmospheric sensors highlighted in red). Right: Photos made by drone for context.

air into northern Europe, yielding warmer, wetter winters, whereas its negative phase weakens the westerly flow, resulting in colder, drier conditions across the region (Iles and Hegerl, 2017; Hurrell, 1995; Hurrell and Loon, 1997; Deser et al., 2017). These insights are compared with ground-based measurements conducted at OSO, throughout this paper.

In addition, the site is situated far away from major sources of air pollutants, and the measurements are performed in background air most of the time ( $\approx 60\%$ , Wängberg et al. (2016)).

## 2.2 Instrumentation

The current section gives a description of the sensors deployed and the quantities measured (see Table 1).

### 2.2.1 Vaisala Weather station on the instrumented mast

The temperature, relative humidity, and pressure sensors of the Vaisala weather transmitter WXT520 are mounted on a concrete tower at  $\sim 16$  m height above the surface (Table 1). Data are continuously acquired, and averages are recorded once per minute. The data from these sensors are available from August 2009 to April 2025 (included).

The wind sensor, located on the same mast, captures real-time data on wind speed, gust and direction. This sensor delivers accurate and consistent measurements that are crucial for atmospheric research. As before, the wind sensor is measuring continuously between 2009 and 2025.

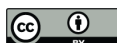

**Table 1.** Sensors of the ground-based atmospheric measurements at the OSO. The height is given in meters above the sea level (a.s.l.). Specified accuracies and measuring ranges are manufacturer information. The corresponding data files are also given.

| Measured quantity  | Wind                                                         |          | Temperature | Rel. humidity | Pressure     | Rainfall     |         |          |
|--------------------|--------------------------------------------------------------|----------|-------------|---------------|--------------|--------------|---------|----------|
|                    | Direction                                                    | Speed    |             |               |              | Rain rate    | Rain 1h | Rain 24h |
| Parameter ID       | WD                                                           | WS       | T           | RH            | P            | RR           | R1h     | R24h     |
| Unit               | °                                                            | m/s      | °C          | %             | hPa          | mm/h         | mm      | mm       |
| Date (DD/MM/YYYY)  | 20/08/2009 - 30/04/2025                                      |          |             |               |              |              |         |          |
| Location (lat/lon) | 57.392449 °N/11.917291 °E                                    |          |             |               |              |              |         |          |
| Height (m)         | 16.1m (on the instrumented mast)                             |          |             |               |              |              |         |          |
| Type               | Vaisala Weather transmitter WXT520                           |          |             |               |              |              |         |          |
| Measuring range    | 0–360°                                                       | 0–60 m/s | -52–60°C    | 0–100%        | 600–1100 hPa | 0–200 mm/h * |         |          |
| Accuracy           | ± 3°                                                         | ± 0.3 %  | ± 0.3°C     | ± 5% RH       | ±0.5 hPa     | ± 5 %        |         |          |
| Data Link          | Data temporarily restricted (e.g. during the review process) |          |             |               |              |              |         |          |

\*: broader range with reduced accuracy

| Measured quantity  | Cloud Cover               | Solar Irradiance                                             |
|--------------------|---------------------------|--------------------------------------------------------------|
| Parameter ID       | CC                        | E                                                            |
| Unit               | %                         | W/m <sup>2</sup>                                             |
| Date (DD/MM/YYYY)  | 17/09/2019 - 30/04/2025   | 08/08/2018 - 30/04/2025                                      |
| Location (lat/lon) | 57.392103 °N/11.918861 °E | 57.395350 °N/11.925274 °E                                    |
| Height (m)         | 3 m                       | 12 m                                                         |
| Type               | Sky Imager ASI-16         | SMP6-V Smart Pyranometer / Field of view: 180°               |
| Measuring range    | 0 - 100%                  | –200 to 2000 W/m <sup>2</sup>                                |
| Accuracy           | -                         | ±2 %                                                         |
| Data Link          | -                         | Data temporarily restricted (e.g. during the review process) |

The rain sensor is a device that accurately measures real-time rain rate (RR: rain intensity in mm/h, calculated from the amount of rain during the last minute) and cumulative rainfall over 1-hour (R1h in mm) and 24-hour (R24h in mm) periods.

75 The measurement dates are the same as for the other sensors.

## 2.2.2 Sky camera

The sky camera imager is an optical instrument designed to capture high-resolution, real-time images of the sky. This camera is intended to be used for capturing all-sky images in the visible spectrum, inspection, and analysis of clouds during daytime with a 180° field of view to the sky and the horizon. Here, we estimate the cloud cover values by counting the clear and cloudy





80 pixels in the images and calculating  $cc = 100 \times \frac{\text{number of cloudy pixels}}{\text{total number of pixels}}$ . The sky camera records images every 15 minutes between September 2019 and April 2025. Note that no images were saved between June 30 (12:00) and August 5 (12:00), 2022.

### 2.2.3 Pyranometer

As an addition to the previous instruments, global radiation is measured using a pyranometer, SMP6-V Smart Pyranometer (Kipp & Zonen). The sensor is installed 1.5 m above the grass surface. It measures the global horizontal solar irradiance every  
 85 minute over a wide temperature range (−40 to +80°C) with a 180° field of view. The data are updated every minute, from August 2018 to April 2025. To match the data from the sky camera, we use here the observations between September 2019 and April 2025. The year 2022 exhibits a disruption in continuous measurements over a certain period due to a sensor malfunction.

## 3 Data availability

The data described in this manuscript are available through PANGAEA: (1) Ground-based meteorological measurements at  
 90 the Onsala Space Observatory (Sweden) between 2009 and 2025; (2) Ground-based atmospheric solar radiation measurements at the Onsala Space Observatory (Sweden) between 2009 and 2025. They are currently under temporary restricted access for reviewers only during the peer-review process. Upon publication, the datasets will become fully open and accessible through their final DOIs. The final DOIs and complete citations are provided in the reference list (Mascut et al., 2025a, b).

In all time series, the first column represents UTC date and time, with the format yyyy-mm-ddThh:mm:ss. The columns  
 95 are separated by tabs (\t). A detailed file description is provided in Table 1.

The record of NAO phases from 1950 to present is available from NOAA's Climate Prediction Center (<https://www.cpc.ncep.noaa.gov/products/precip/CWlink/pna/nao.shtml>).

## 4 Data at the OSO (2009-2025)

The data presented here reflects the evolution of ground-based atmospheric parameters measured at the OSO over a period of  
 100 15 years and 8 months (August 2009 - April 2025). For the presentation of this dataset, we have structured the measurements as follows: the temperature, relative humidity and pressure sensors (Sec. 4.1, 4.2 & 4.3), the rain sensor (Sec. 4.4), the wind sensor (Sec. 4.5), and the combination of computations derived from the sky camera and the pyranometer (Sec. 4.6).

Figure 2 (left side) displays: (a) temperature and relative humidity measurements for the entire period (2009–2025); (b) the monthly averages of these measurements; (c) the pressure measurements along with their monthly averages; and finally, (d)  
 105 and (e) the monthly averages of temperature and relative humidity, respectively, for each year. Note that the averages for 2009 and 2025 should be interpreted with caution since the data do not cover complete years.

It has been shown in numerous studies that weather parameters are affected in various ways and by processes of different scales (e.g. Busuioc et al., 2001; Rimbu et al., 2001). The atmospheric processes impacting meteorological parameters vary



not only by region, but also between seasons (e.g. Dankers et al., 2008; on Climate Change , IPCC). Therefore, our analysis takes seasonal variations into account.

On the right side of Figure 2, the daily anomalies (cycles) for the three parameters (T, RH and P) are presented according to season. For this purpose, the seasons are defined as follows: (a) winter: December 1st to February 28th (or 29th); (b) spring: March 1st to May 30th; (c) summer: June 1st to August 31st; and (d) autumn: September 1st to November 30th. Thus, the data are binned by season, and the daily mean value is subtracted, so the resulting anomaly represents the deviation from this reference value (i.e. the diurnal variations). Data from 2009 and 2025 have been excluded from this calculation.

#### 4.1 Dynamics of Temperature

The seasonal cycle of temperature is well-defined: (1) cold winters with minimum temperatures dropping below 0°C, reaching −5 to −10°C in some years (e.g. 2010-2013, 2024); and (2) mild to moderately warm summers, with maximum temperatures reaching 20 to 25°C (e.g. 2014-2016, 2018-2019). The inter-annual average temperature is 9.0°C, typical for a maritime temperate climate.

The Figure 2(d) shows that although the seasonal structure remains broadly consistent, notable interannual variability is present. Some years exhibit higher average temperatures during winter and autumn, potentially associated with climatic anomalies—such as atmospheric circulation patterns favouring mild winters in Scandinavia. Some years are marked by colder winters, as in 2009–2010 or in 2010-2011, when a pronounced negative phase of the North Atlantic Oscillation (NAO-, Fig. A1) favoured Arctic air intrusions and led to unusually low temperatures. Conversely, the positive NAO phase during the winter of 2019–2020 contributed to exceptionally mild conditions.

Temperature daily anomalies (Fig.2f) exhibit a clear diurnal variation across all seasons, with positive anomalies during the day (approximately between 08:00 and 20:00-21:00) and negative anomalies at night. In winter, this variation is the least pronounced ( $\pm 0.5$  °C), and positive anomalies appear later, around 09:00. In spring, the anomalies are the most pronounced ( $\pm 1.5$  °C), both positive and negative. In summer, the pattern is very similar to spring, but with slightly weaker anomalies. The minimum anomalies occur around 04:00 in spring and summer, 05:00 in autumn, and 06:00 in winter. The maximum anomalies, on the other hand, occur around 12:00, 15:00, and 16:00 in winter/autumn, spring, and summer, respectively. This implies that positive anomalies persist for a shorter duration in winter than in autumn—and even less than in summer or spring—likely reflecting the seasonal differences in sunshine, which directly influence diurnal temperature anomalies.

#### 4.2 Relative Humidity

Relative humidity at the OSO site exhibits a pronounced annual and diurnal cycle but **only weak interannual drift** over the 2009–2025 record (see Sec.5). Monthly averages (Figure 2b,e) peak in the cold season (December–February; RH  $\approx 75 - 85\%$ ) and bottom out in midsummer (June–August; RH  $\approx 65 - 75\%$ ), yielding a long-term mean of 76.95%.

Humidity daily anomalies (Fig. 2g) follow an inverse pattern to temperature. Indeed, superimposed on this seasonal envelope, the diurnal anomaly shows a consistent early-morning maximum (anomaly +1% to +5% depending on season) and mid-



# Temperature, Relative Humidity & Pressure: Data, Monthly Averages & Daily Anomalies Instrument: Weather Station at the OSO August 2009 - April 2025

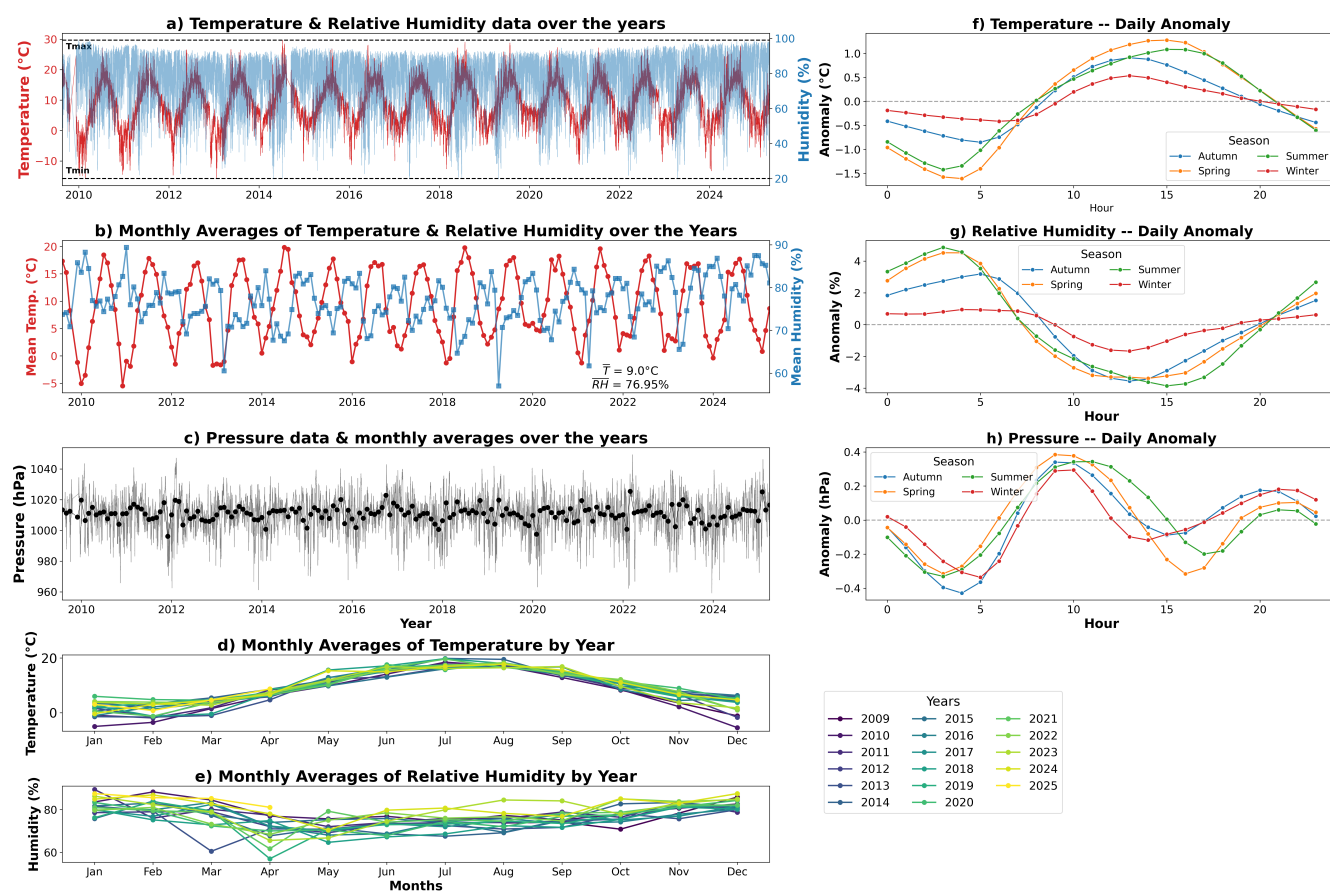

**Figure 2.** Temperature, relative humidity, and atmospheric pressure recorded at the OSO over a 15-year and 8-month period. (a) Time series of temperature (°C, red) and relative humidity (% , blue) data. (b) Monthly mean values of temperature and relative humidity, with overall means. (c) Time series of atmospheric pressure (hPa, grey), including monthly means (black). (d) Monthly mean temperature by year, color-coded by calendar year. (e) Monthly mean relative humidity by year, color-coded by calendar year. (f–h) Diurnal anomalies (from daily mean) of temperature (f), relative humidity (g), and pressure (h) averaged by season.

afternoon minimum (anomaly  $-2\%$  to  $-4.0\%$ ), with the largest amplitude occurring in summer/spring and the smallest in winter. Autumn, on the other hand, shows an intermediate behavior at night and is similar to spring during the day.

Comparison of the monthly RH patterns across individual years (Figure 2e) reveals only modest year-to-year scatter. The coastal location on the Swedish west coast further reinforces an interpretation of a moisture regime strongly controlled by maritime influence: proximity to the Kattegat and North seas ensures a quasi-permanent supply of moisture, moderating the



seasonal amplitude compared to continental sites, attenuating afternoon RH minima, and sustaining relatively elevated morning peaks, especially in summer.

### 4.3 Atmospheric Pressure

The evolution of atmospheric pressure (Fig.2c) over the studied period reveals a strong intra-annual variability, typical of seasonal cycles. Pressure fluctuates between approximately 970 and 1050 hPa.

It exhibits a clear semidiurnal cycle, with two peaks and two troughs per day (Fig. 2h), whose shape varies with the seasons. These variations, known as thermal atmospheric tides, are complex and not yet fully understood. However, they are primarily driven by the absorption of solar radiation by ozone in the stratosphere, with additional contributions from water vapor (Siebert, 1961; Chapman and Lindzen, 1970; Haurwitz and Cowley, 1973; Pugh, 1987). In the upper atmosphere, the diurnal heating cycle generates pressure oscillations, but due to the dynamic structure of the atmosphere, the semidiurnal harmonic becomes dominant (Pugh, 1987; Le Blancq, 2011). As a result, two pressure cycles are observed daily.

At the surface, the primary (diurnal) minimum typically occurs around 04:00, and the secondary (diurnal) maximum around 21:00, relatively constant across all seasons. In contrast, the timing of the semidiurnal variation shows a seasonal dependence: its secondary minimum occurs earlier in winter and autumn (around 15:00) than in spring and summer (around 18:00). Overall, these atmospheric tides result in lower atmospheric pressure during the night compared to the daytime.

Previous studies have shown that the amplitude of atmospheric tides varies with latitude—from about 0.3 hPa near the poles to around 3.0 hPa in the tropics (Le Blancq, 2011). The amplitude observed at OSO (lat  $\sim 57.4^\circ\text{N}$ ) aligns with this latitudinal trend, with a typical amplitude of  $\sim 0.8$  hPa. Furthermore, a seasonal modulation is also evident in our data, supporting earlier findings. Our results are consistent with those reported at the Observatorio Astronómico Nacional in Sierra San Pedro Mártir (OAN-SPM) for the 2007–2019 period (Plauchu-Frayn et al., 2020).

### 4.4 Dynamics of Precipitations

Figure 3 provides an overview of precipitation dynamics recorded at the OSO between August 2009 and April 2025, based on high-frequency observations from the on-site rain sensor. The figure combines minute-resolution rain rate measurements (panel a) with hourly (b) and daily accumulation (c) statistics. In addition to the measurements directly obtained from the rain sensor, we estimate the number of days with measurable precipitation ( $R_{24h} \geq 1$  mm) and those with heavy precipitation ( $R_{24h} \geq 20$  mm). These threshold values are chosen knowing that the average daily precipitation ( $R_{24h}$ ) is  $\sim 5$  mm, so a heavy precipitation day can reasonably be defined as one with  $R_{24h} \geq 20$  mm.

Rain events are irregularly distributed in time but occur consistently across the 15-year record. Rain rate peaks can exceed 200 mm/h, although such extremes are infrequent. Rainfall extremes exceeding 50 mm in 24h are rare but recurrent, aligning with heavy precipitation thresholds defined previously or by regional climatologies (e.g. Donat et al., 2014; Plauchu-Frayn et al., 2020).

Panel (d) quantifies the annual number of rainy days, distinguishing between measurable precipitation events ( $R_{24h} \geq 1$  mm, blue bars, left axis) and heavy rainfall events ( $R_{24h} \geq 20$  mm, red bars, right axis). The number of rainy days ( $R_{24h} \geq 1$



### Rain measurements & Number of Rainy Days Instrument: Rain sensor at the OSO Aug. 2009 - Apr. 2025

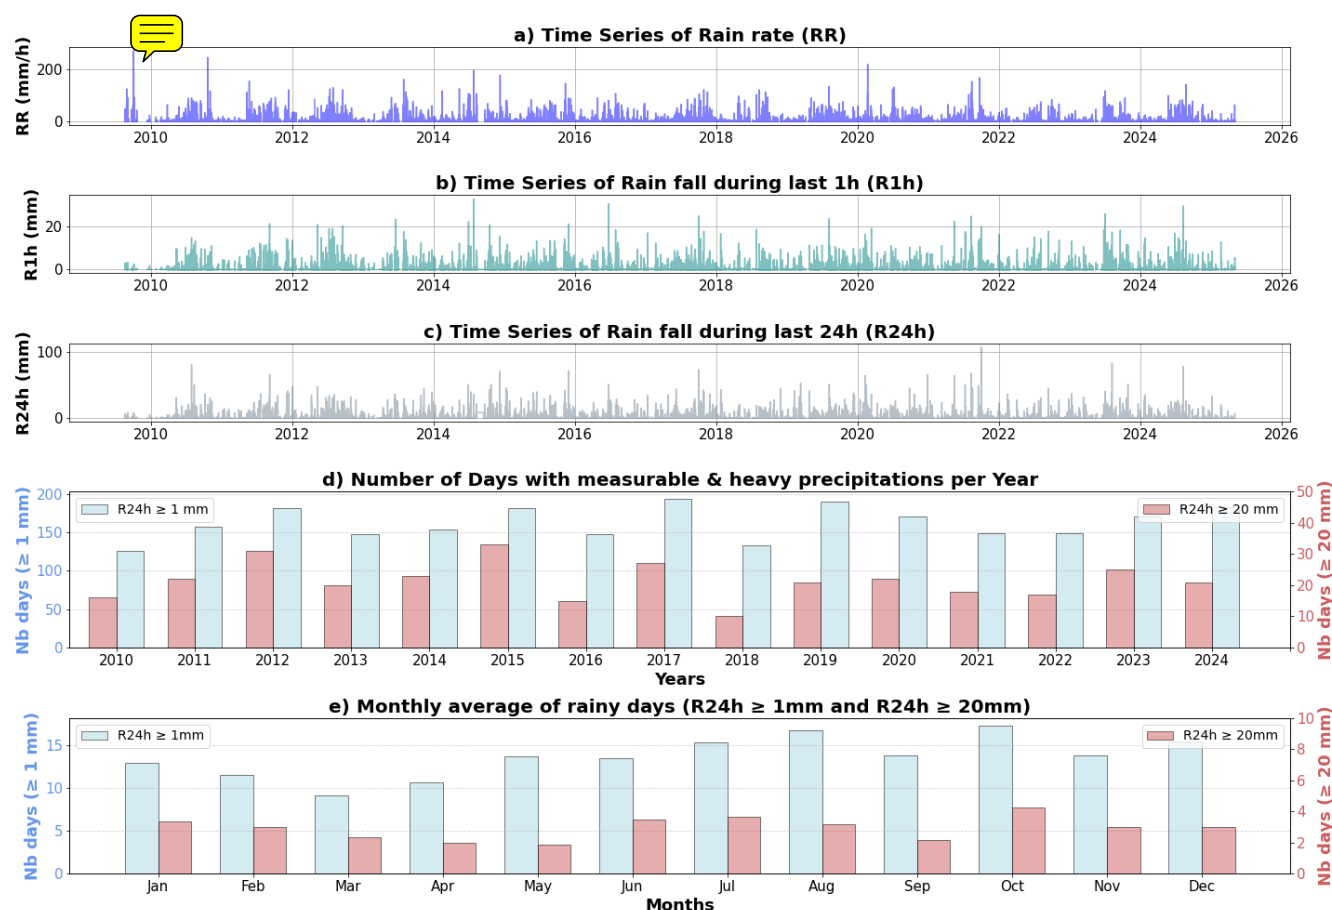

**Figure 3.** Rainfall measurements and number of days with measurable and heavy precipitation observed at the OSO from August 2009 to April 2025. (a) Time series of rain rate (RR, in mm/h). (b) Time series of accumulated rainfall over 1 hour (R1h, in mm). (c) Time series of accumulated rainfall over 24 hours (R24h, in mm). (d) Annual number of days with measurable ( $R24h \geq 1$  mm; blue bars) and heavy precipitation ( $R24h \geq 20$  mm; red bars). (e) Monthly number of days with measurable and heavy precipitation, using the same thresholds and color coding as in panel (d).

mm) remains relatively stable over the years (typically between 120 and 180 days/year), while heavy rainfall days ( $R24h \geq 20$  mm) show greater interannual variability, ranging from fewer than 10 days (2018) to over 30 days (2015). These variations are partly associated with interannual shifts in the NAO.



Panel (e) shows the monthly number of rainy days (2010-2024). Measurable precipitation ( $R_{24h} \geq 1$  mm) occurs most frequently from August to December, with monthly averages reaching up to 15 days. This seasonal maximum reflects increased cyclonic activity during the boreal cold season. Conversely, heavy precipitation ( $R_{24h} \geq 20$  mm) is most common in autumn, with October exhibiting the highest frequency of such events (up to 5 days/month on average). Spring months (March–May) show lower frequencies of both measurable and heavy rainfall, consistent with reduced synoptic-scale forcing and a greater prevalence of convective, localized events.

Together, these patterns reveal a rainfall regime at OSO characterized by frequent light to moderate precipitation and a smaller number of intense events. The marked seasonal cycle and interannual variability are typical of coastal western Sweden and reflect the site's exposure to North Atlantic storm tracks.

#### 4.5 Wind Regimes and Synoptic Patterns

On the west coast of Sweden, the dominant winds are primarily influenced by the North Atlantic Ocean and regional weather patterns. Figure 4 provides a comprehensive overview of wind conditions recorded at the OSO from August 2009 to April 2025. It includes the site's geographic context, the overall wind direction and speed distribution (wind rose), seasonal wind patterns, and histograms detailing the frequency of wind direction, wind speed, and gusts.

The most frequent wind directions are West-Southwest (WSW) and East-Northeast (ENE). WSW winds, originating from the sea, carry marine aerosols and moisture, strongly impacting local thermodynamic conditions. These maritime winds have a moderating effect on air temperatures—especially during winter months—and contribute to cloud formation and precipitation.

They also promote vertical mixing, leading to more stable near-surface temperature profiles and reduced diurnal temperature ranges.

These dynamics are consistent with broader-scale findings over Central Europe. According to Donat et al. (2010), approximately 80% of windstorm days in this region are linked to westerly flows, and windstorm occurrence is strongly modulated by the NAO. Most events occur during moderately positive NAO phases, while the rarer strongly positive phases account for over 20% of all severe windstorm occurrences. These synoptic conditions often favor enhanced cyclonic activity across the North Atlantic, increasing the frequency and intensity of maritime winds reaching Scandinavia.

In contrast, ENE winds are continental in origin and generally dry and cool. These winds are typically associated with anticyclonic weather patterns, which lead to clear skies, strong radiative cooling at night, and warmer daytime temperatures, especially during the spring. These conditions are favorable to temperature inversions, whereby colder air remains trapped near the surface due to a lack of atmospheric mixing.

Figure 4 confirms that the strongest winds—exceeding 10 m/s—are predominantly marine (WSW sector), while continental winds are more moderate, often below 6 m/s. The wind rose also shows that winds can occasionally blow from all directions, although the northern sector contributes little to the overall wind regime.

Overall, the OSO region appears to be dominantly influenced by WSW marine winds and, to a lesser extent, ENE continental winds. Figure B1 shows annual wind roses from 2009 to 2025. Note that data for 2009 and 2025 only cover part of the year (August–December for 2009 and January–April for 2025).





### Wind Direction, Gust & Speed Data -- Instrument: Wind sensor at the OSO August 2009 - April 2025

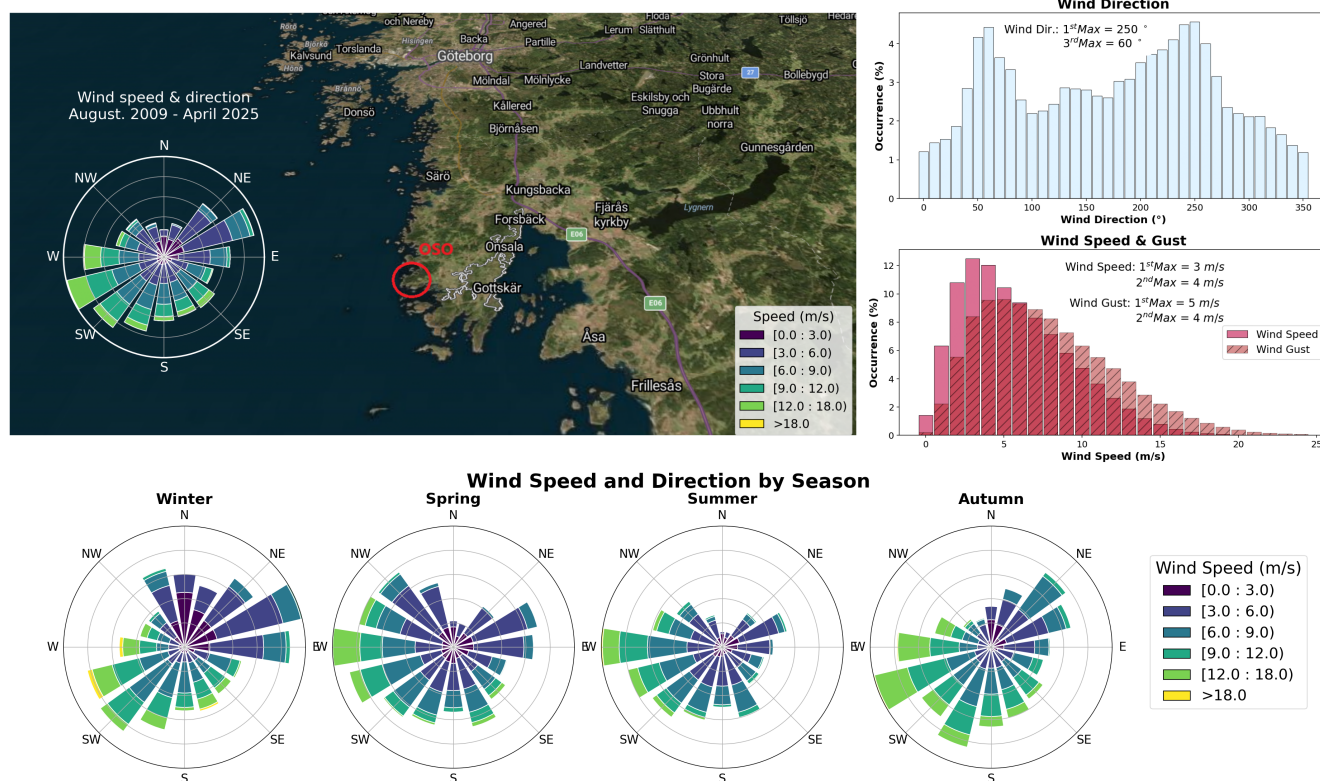

**Figure 4.** Wind direction and speed recorded at the OSO from 2009 to 2025. The central map (Source: Google Maps – <https://maps.google.com>) shows the location of the OSO on the Swedish west coast for geographic context. The wind rose diagram (left on the map) displays the distribution of wind direction and speed over the entire period. Top right: Wind direction (in °) histogram (i.e. frequency distribution) and wind speed (solid bars) and wind gust (hatched bars) histogram. Bottom panels: Seasonal wind roses (Winter, Spring, Summer, Autumn). Colours represent different wind speed classes.

The upper-right panel in Figure 4 shows that winds most frequently originate from 250° (WSW) and 60° (ENE). In contrast, directions such as true North (0° or 360°) show minimal occurrence. Wind speeds range from 0 to 25 m/s, with a peak occurrence at 3 m/s and most values between 2 and 8 m/s.

To evaluate seasonal variability, we excluded incomplete years (2009 and 2025). The strongest winds (exceeding 12 m/s) are observed during autumn and winter, while summer features fewer strong wind events. For all seasons, winds from the eastern half of the compass (land origin) are weaker than those from the west (ocean origin). Seasonal patterns observed in Figure 4 are as follows:

- *Winter:* Winds primarily originate from the North and North-Northeast, with stronger winds from the Southwest. These patterns are consistent with earlier studies such as Chen (2000), and align with the cyclonic pathways described by Donat



225 et al. (2010), where storms follow a dominant trajectory from the North Atlantic across the British Isles and southern Scandinavia toward the Baltic Sea.

- *Spring*: Winds shift to a predominantly westerly origin, still maritime but generally less intense.
- *Summer*: Winds come from the West and occasionally from the South, with limited influence from the North. This season features the lowest occurrence of strong winds.

230 – *Autumn*: Winds return to a Southwest and Northeast pattern. This is a storm-prone season, with frequent strong gusts associated with deep depressions, often enhanced by NAO+ phases.

The influence of the NAO is particularly noticeable in winter. Positive phases (NAO+) are characterized by enhanced zonal flow, bringing mild, wet weather and frequent westerly storms to northern Europe.

#### 4.6 Cloud cover & Solar Irradiance

235 Figure 5 presents the temporal evolution of solar irradiance ( $E$ ) from 2018 to 2025 (top panel), along with its seasonal and diurnal interactions with the cloud cover (lower panel). It should be noted that  $E$  is a direct measurement (from the pyranometer), whereas cloud cover ( $CC$ ) is an estimate. The latter is obtained by calculating the percentage of cloudy pixels in the sky camera image relative to the total number of pixels.

The irradiance time series exhibits a clear annual periodicity, with pronounced peaks during the summer months and troughs 240 during winter. Maximum irradiance values exceed  $1200 \text{ W/m}^2$  in summer, whereas values frequently fall below  $200 \text{ W/m}^2$  in winter, consistent with expected seasonal variations in solar angle and daylight duration. Superimposed on this seasonal cycle are high-frequency fluctuations, largely modulated by cloud cover variability.

The 3D scatter plots (lower panel in Fig.5) provide insight into the joint distribution of  $E$ ,  $CC$ , and hour of day across the four seasons:

- 245 – *Winter*: Irradiance remains low across all cloud cover conditions, rarely exceeding  $600 \text{ W/m}^2$ . The time window for significant irradiance is narrow (approximately 09:00 to 15:00), reflecting the short photoperiod.
- *Spring*: Irradiance levels increase substantially, with maximum values reaching up to  $1000 \text{ W/m}^2$ . The irradiance distribution broadens with time of day and cloud cover, suggesting a more dynamic range of sky conditions. Clear-sky conditions begin to contribute significantly to total solar energy.
- 250 – *Summer*: This season presents the highest irradiance values and the longest duration of solar exposure, with peak irradiance occurring between 08:00 and 16:00. Despite the presence of high cloud cover in some instances, irradiance often remains elevated, indicating the influence of partially cloudy skies and potential cloud edge enhancement effects.
- *Autumn*: As solar elevation decreases, irradiance levels and daylight duration both diminish. The pattern is similar to spring but with an overall decline in peak irradiance and a noticeable shift of the irradiance peak toward midday.



## Solar irradiance and Cloud Cover -- Instrumented: Pyranometer and Sky Camera From Aug. 2018 to Apr. 2025

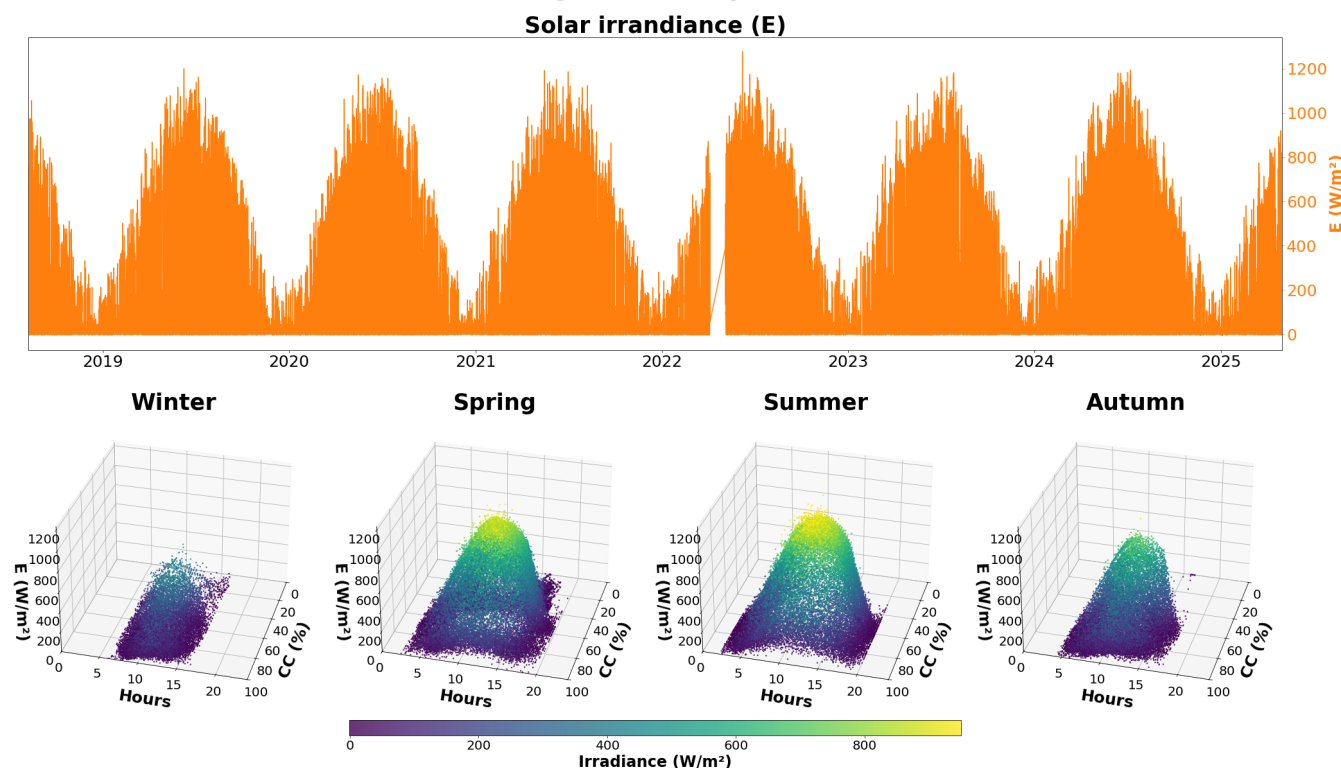

**Figure 5.** Temporal evolution and seasonal characteristics of solar irradiance ( $E$ ) and cloud cover ( $CC$ ), as measured by the pyranometer and estimated from the sky camera. Top panel: Time series of solar irradiance ( $E$  in  $\text{W/m}^2$ ) from August 2018 to April 2025. Lower panel: 3D scatter plots of  $E$  as a function of  $CC$  and hour of day for each season (Winter, Spring, Summer, Autumn) between September 2019 and April 2025.

255 Across all seasons, the inverse relationship between  $CC$  and  $E$  is evident. However, the relationship is non-linear: significant irradiance can still occur under moderate to high  $CC$  conditions, especially in summer. This reflects the complex interplay between cloud optical properties, cloud type, and solar geometry. These results highlight the importance of considering both cloud cover and diurnal cycles in solar resource modeling. Seasonal variability plays a critical role not only in the total irradiance received but also in the timing and reliability of solar availability.

## 260 5 Inter-annual trends

In this section, we analyse the 15-year trends (2010–2024) of the parameters introduced above, excluding cloud cover ( $CC$ ) and solar irradiance ( $E$ ) for which less than five complete years of data are available. We consider only full calendar years (2010–2024) and compute trends based on annual mean values.

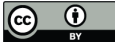

Figure 6 displays the annual averages of each parameter together with their linear regression fits. Table 2 reports the slope ( $a$ ) and intercept ( $b$ ) of the regression model  $ax + b$  (with  $x = 1, 2, \dots, N$  years) alongside the associated p-values. Cells highlighted in bold correspond to p-values  $\leq 0.05$ , indicating statistical significance at the 95% confidence level. In addition, Table 2 also includes the Root Mean Square Error (RMSE) of each linear regression. RMSE quantifies the average deviation of the observed annual means from the fitted trend line and serves as an indicator of how well the fit captures interannual variability.

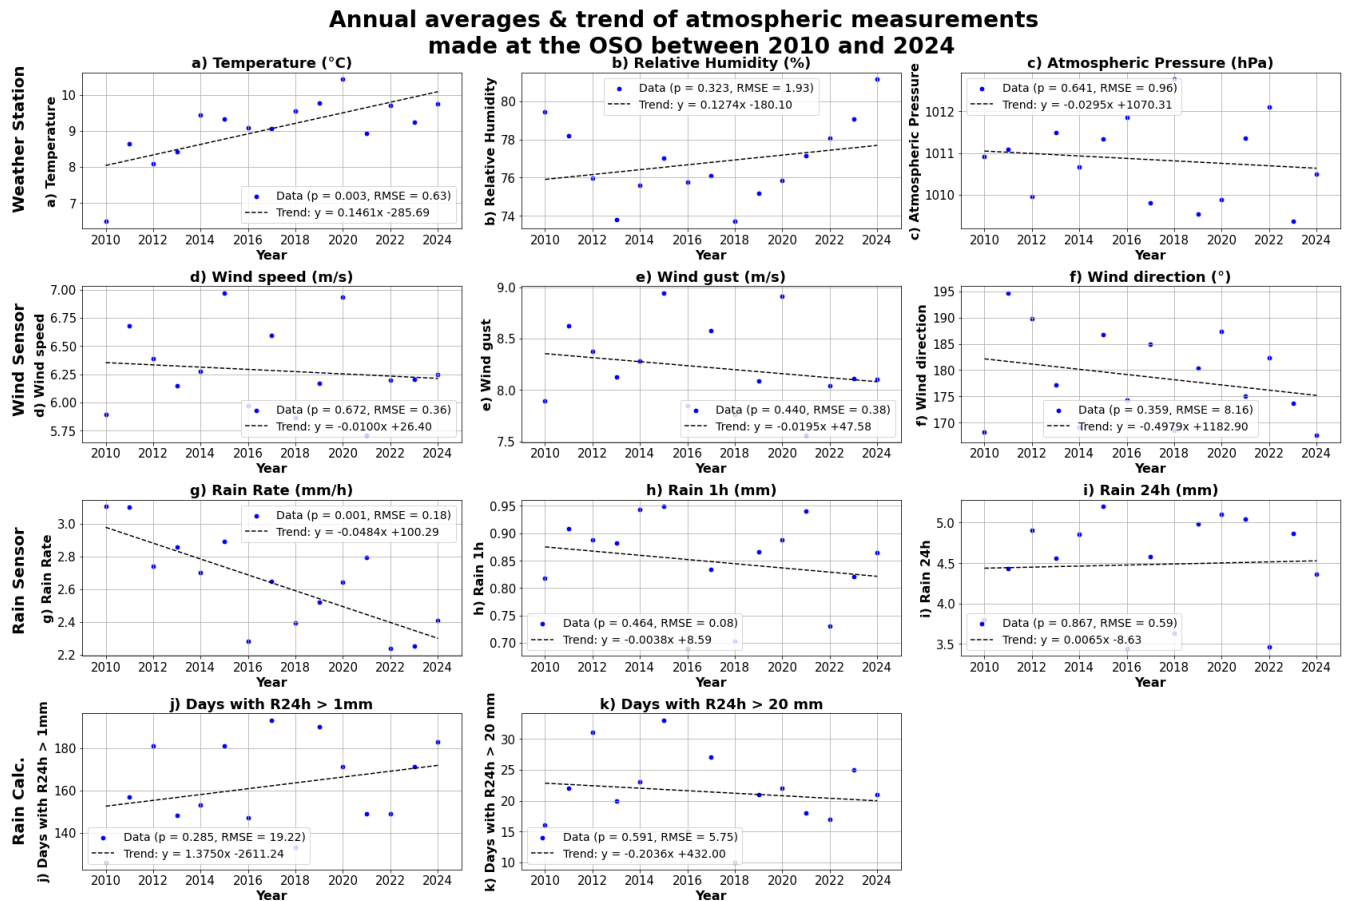

**Figure 6.** Annual mean values and linear trends of atmospheric variables recorded at the OSO from 2010 to 2024. Panels (a–c) show (a) temperature, (b) relative humidity, and (c) atmospheric pressure; panels (d–f) display wind characteristics: (d) wind speed, (e) gust speed, and (f) wind direction; panels (g–i) present precipitation metrics: (g) rain rate, (h) total rainfall in 1 h, and (i) total rainfall in 24 h; and panels (j–k) summarize rainfall occurrence: (j) number of days with  $\text{R24h} \geq 1$  mm and (k) days with  $\text{R24h} \geq 20$  mm. Dotted lines denote the best-fit linear trends, and p-values and RMSE for trend significance are indicated in each panel’s legend.

Annual mean air temperature exhibits a robust warming of  $+0.1461^{\circ}\text{C}\cdot\text{yr}^{-1}$  ( $p = 0.003$ ,  $\text{RMSE} = 0.63$ ), raising the 2010–2024 average from  $6.5^{\circ}\text{C}$  to  $\sim 9.75^{\circ}\text{C}$ . Over the 15-year period, this corresponds to an increase of about  $2.2^{\circ}\text{C}$  in the annual average

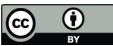

**Table 2.** Linear annual trends (2010–2024) of meteorological parameters measured at the Onsala Space Observatory with: slope  $a$  ( $\pm$  standard deviation), intercept  $b$  ( $\pm$  standard deviation),  $p$ -value, RMSE, and indication of statistical significance. Bold font indicates parameters with statistical significance at a 95% confidence level.

| Parameter          | Unit    | $a \pm \sigma_a$ (unit/yr)           | $b \pm \sigma_b$ (unit)              | $p$ -value   | RMSE        | Variation                                    |
|--------------------|---------|--------------------------------------|--------------------------------------|--------------|-------------|----------------------------------------------|
| Temperature        | °C      | <b><math>0.1461 \pm 0.041</math></b> | <b><math>-285.7 \pm 81.72</math></b> | <b>0.003</b> | <b>0.63</b> | <b><math>\sim 2.2</math> °C over 15yr</b>    |
| Relative Humidity  | %       | $0.1274 \pm 0.124$                   | $-180.1 \pm 250.13$                  | 0.323        | 1.93        | Not significant                              |
| Pressure           | hPa     | $-0.03 \pm 0.062$                    | $1070.31 \pm 124.57$                 | 0.641        | 0.96        | Not significant                              |
| Wind Speed         | m/s     | $-0.01 \pm 0.023$                    | $26.4 \pm 46.48$                     | 0.672        | 0.36        | Not significant                              |
| Wind Gust          | m/s     | $-0.02 \pm 0.025$                    | $47.58 \pm 49.46$                    | 0.44         | 0.38        | Not significant                              |
| Wind Direction     | m/s     | $-0.50 \pm 0.524$                    | $1182.90 \pm 1056.1$                 | 0.359        | 8.16        | Not significant                              |
| Rain rate (RR)     | mm/h    | <b><math>-0.048 \pm 0.012</math></b> | <b><math>100.3 \pm 23.38</math></b>  | <b>0.001</b> | <b>0.18</b> | <b><math>\sim -0.73</math>mm/h over 15yr</b> |
| Rain 1h (R1h)      | mm      | $0.004 \pm 0.005$                    | $8.59 \pm 10.27$                     | 0.464        | 0.08        | Not significant                              |
| Rain 24h (R24h)    | mm      | $0.007 \pm 0.038$                    | $-8.63 \pm 76.74$                    | 0.867        | 0.59        | Not significant                              |
| Meas. Precip. Days | nb days | $1.375 \pm 1.234$                    | $-2611.24 \pm 2488.9$                | 0.285        | 19.22       | Not significant                              |
| Heavy Precip. Days | nb days | $-0.204 \pm 0.369$                   | $432.0 \pm 744.6$                    | 0.591        | 5.75        | Not significant                              |

temperature — a significant warming trend that may reflect broader regional or global climate warming patterns (on Climate Change , IPCC; Dankers et al., 2008).

For relative humidity, the fitted line suggests a slight increase over time, but with a  $p = 0.323$ , meaning the variation is not statistically significant. When looking at the annual averages point by point, a pattern of alternating decreases and sharp increases appears to be present. Since 2018, the average relative humidity has been steadily increasing in a highly significant manner. This trend could be attributed to increased evaporation due to rising temperatures and/or it might be influenced by changes in precipitation dynamics or oceanic influences.

Regarding atmospheric pressure, the slope is slightly negative but not statistically significant ( $p = 0.64$ ). The annual mean pressure appears stable over this period, showing no meaningful long-term change.

Wind sensor data indicate marginal decreases in annual mean wind speed ( $-0.01 \text{ m.s}^{-1}.\text{yr}^{-1}$ ,  $p = 0.672$ ) and gust magnitude ( $-0.02 \text{ m.s}^{-1}.\text{yr}^{-1}$ ,  $p = 0.44$ ). None of the wind-related trends attain conventional significance, pointing to natural variability as the dominant control.

Precipitation intensity (RR) exhibits a clear downward trend over the study period. The mean rain rate decreases significantly by  $-0.05 \text{ mm h}^{-1} \text{ yr}^{-1}$  ( $p = 0.001$ ), amounting to  $\sim -0.73 \text{ mm h}^{-1}$  over 15 years. This statistically significant decline indicates a measurable reduction in short-term rainfall intensity; however, the dispersion remains within the instrumental margin of error (RMSE = 0.18). In contrast, one-hour rainfall accumulations show a slight, non-significant decrease of  $-0.004 \text{ mm yr}^{-1}$  ( $p = 0.464$ ), while 24-hour totals exhibit a negligible and non-significant increase of  $+0.0065 \text{ mm yr}^{-1}$  ( $p = 0.867$ ). The frequency of precipitation days shows only weak alignment with these intensity trends. The number of days with measurable precipitation



( $R_{24h} \geq 1$  mm) shows an increasing trend, while the number of days with heavy precipitation ( $R_{24h} \geq 20$  mm) tends to decrease, both trends being statistically non-significant.

As an indication, the linear regression trends for seasonal averages has been calculated. This will help determine whether one season is more affected than another by climate change or if an inter-seasonal compensation is visible. Figure C1 and Table C1 show the seasonal averages and their associated trends for each parameter. The p-values indicating a trend with a confidence level up to 95% ( $p \leq 0.05$ ) are:

- For temperature :
  - in autumn ( $p \sim 0.03$ ), the trend shows an increase of  $0.12^{\circ}\text{C}.\text{yr}^{-1}$  (which corresponds to  $\sim 1.76^{\circ}\text{C}$  over 15 years).
  - in winter ( $p \sim 0.03$ ), the increase is  $\sim 0.3^{\circ}\text{C}$  per year ( $\sim 4.5^{\circ}\text{C}$  over 15 years).

Although not statistically significant, temperature trends are also increasing for the other two seasons (spring and summer). However, the most pronounced temperature increase occurs in winter (**203.3%** compared to the annual trend). The deviation from the annual trend then decreases in autumn (**80.1%**), spring (**62.3%**), and summer (**32.9%**).

- For wind:
  - wind speed, in autumn ( $p \sim 0.03$ ): an upward trend is observed ( $-0.063$  m/s per year, which corresponds to  $-0.95$  m/s over 15 years).
  - wind gust, in autumn ( $p \sim 0.009$ ): the decrease is  $\sim 0.1$  m.s $^{-1}$  per year ( $\sim -1.4$  m.s $^{-1}$  over 15 years).

Regarding wind speed, the declining trend in autumn seems to be compensated by an increase in winter, with almost no variation in spring and summer. However, the linear fit has a high p-value (especially for data in summer), so no strong conclusion can be drawn. We observe the same kind of pattern for the seasonal trends of wind gusts.

For rain rate, no season shows a trend with a statistically significant p-value. However, the rain rate tends to decrease in all seasons, which explains why the trend is significant for annual averages. Note that the maximum values are recorded in autumn and summer.

In conclusion, between 2010 and 2024, the OSO station's Vaisala WXT520 record reveals that the increase in temperature is more pronounced in winter than in the other seasons and that the downward trend in the rain rate is evident (but low) throughout the year. The absence of significant trends in the other parameters further highlights the complexity and multifactorial nature of local climate variability.

## 6 Conclusions

We analysed more than 15 years of continuous, high-resolution ground-based atmospheric measurements collected at the Onsala Space Observatory (OSO), located on the Swedish west coast, from August 2009 to April 2025. The dataset includes minute-scale records of near-surface air temperature, relative humidity, atmospheric pressure, precipitation (rain rate, 1-h and 24-h accumulations), sustained wind speed, wind gusts, and direction and solar irradiance. All variables were quality-controlled and analysed statistically. In addition to descriptive analyses, we explored seasonal cycles, interannual variability, and linear trends, and we related key anomalies to the phase of the NAO. Our results confirm several consistent signals:





- *Temperature*: A statistically significant warming trend of  $+0.15^{\circ}\text{C}$  per year was detected, with winter warming reaching approximately 203% above the annual mean rate. The warming signal was most pronounced between 2013 and 2020, and is consistent with Arctic amplification patterns and regional trends reported in Northern Europe.
- 325 – *Precipitation*: While accumulated precipitation (over 1h or 24h) showed no clear trend, we observed a slight but significant decline in rain rate intensity over the study period ( $-0.05$  mm/h/year). The frequency of measurable precipitation days ( $R_{24h} \geq 1$  mm) remained relatively stable across years, while the number of heavy precipitation days ( $R_{24h} \geq 20$  mm) showed greater interannual variability. Seasonal analyses confirmed summer and autumn as the wettest seasons, and spring as the driest.
- 330 – *Wind*: Westerly (WSW) maritime flows dominate the wind data, with wind roses showing stronger wind speeds and gusts during winter and autumn months. Windstorm activity was found to correlate with NAO phase, with most events occurring under moderately or strongly positive NAO conditions. The mild winter of 2019–2020, for instance, coincided with a positive NAO phase, while the cold winter of 2009–2010 occurred during a strong negative NAO phase.
- *Pressure*: Atmospheric pressure displayed clear semidiurnal tides, consistent with theoretical expectations and prior  
 335 studies. The timing and amplitude of pressure oscillations showed seasonal modulation, particularly in the timing of the secondary minima.
- *Solar irradiance*: Solar irradiance followed well-defined seasonal and daily cycles, with maxima in summer and minima in winter. Despite an overall inverse relationship with cloud cover, significant irradiance can still occur under moderate cloud conditions, especially in summer.

340 Together, these observations provide a valuable benchmark for understanding local expressions of broader climate dynamics. Although this dataset is geographically limited, it captures key processes relevant to Northern European coastal climates, including land–sea interactions, mid-latitude storm tracks, and NAO-related variability. By making this dataset publicly available, we aim to support further research in regional trend attribution, model evaluation, and synoptic climatology.

*Author contributions.* FM conducted the study, performed the analysis, and wrote the manuscript. RH provided information about the in-  
 345 struments, supplied the measured data, maintained the instruments, and reviewed the manuscript. PF supervised the work and reviewed the manuscript.

*Competing interests.* The authors declare that they have no conflict of interest.

*Acknowledgements.* The Onsala Space Observatory is mainly supported by the Swedish Research Council, Land Survey (lantmäteriet), and Chalmers University of Technology. The authors acknowledge the NOAA's Climate Prediction Center for providing the North Atlantic  
 350 Oscillations data.

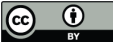

## Appendix A: North Atlantic Oscillation (NAO) phases

The data and information in this appendix are sourced from the NOAA website (<https://www.cpc.ncep.noaa.gov/products/precip/CWlink/pna/nao.shtml>). FigureA1 shows the monthly NAO index values between 2009 and 2025. The data for the winter months (December, January, and February) are highlighted: red indicates a negative index (NAO–) and dark blue indicates a positive index (NAO+).

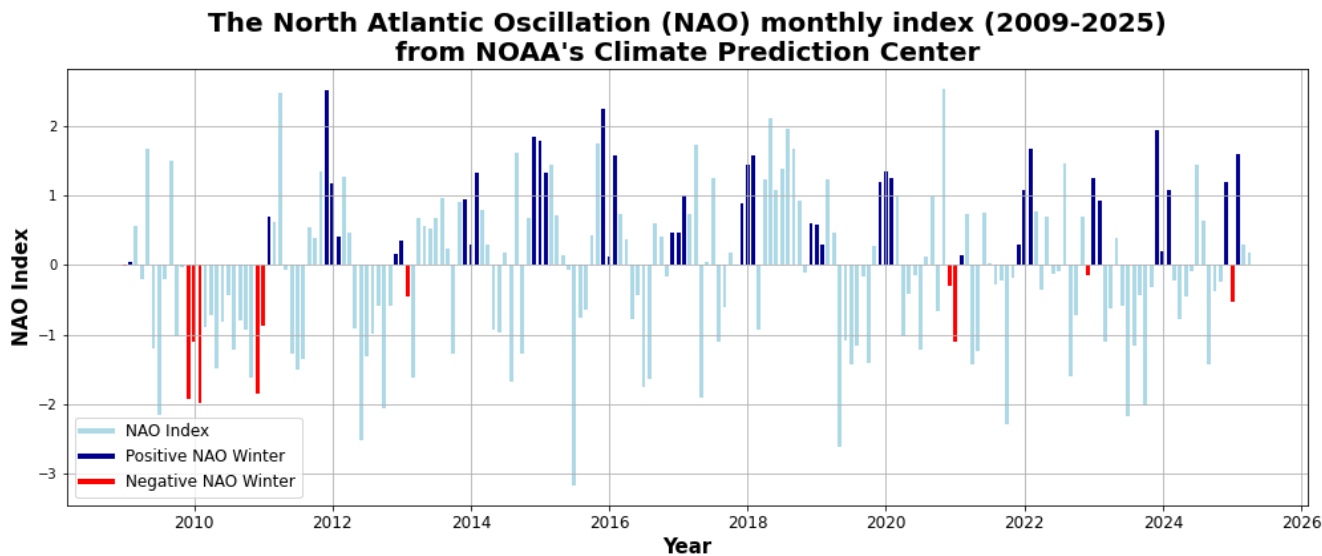

**Figure A1.** The monthly index of the North Atlantic Oscillation between 2009 and 2025. Data from NOAA’s Climate Prediction Center.

TableA1 presents the impact of the NAO phase (positive or negative) on the local weather in our study region (the west coast of southern Sweden).



**Table A1.** Impacts of NAO Phases on Weather along the West Coast of Sweden, by Season. *Source: NOAA Climate.gov, “Climate Variability: North Atlantic Oscillation” (2009)*

| Season                  | Positive NAO (NAO+)                                                                                                                                                                                                                                                                                                                          | Negative NAO (NAO–)                                                                                                                                                                                                                                                |
|-------------------------|----------------------------------------------------------------------------------------------------------------------------------------------------------------------------------------------------------------------------------------------------------------------------------------------------------------------------------------------|--------------------------------------------------------------------------------------------------------------------------------------------------------------------------------------------------------------------------------------------------------------------|
| <b>Winter (Dec–Feb)</b> | <ul style="list-style-type: none"> <li>– Strengthened sub-polar low (Icelandic Low) and subtropical high (Azores High) → stronger Atlantic jet stream and northward-shifted storm track</li> <li>– Increased storminess and above-average precipitation in northern Europe</li> <li>– Above-average temperatures (milder winters)</li> </ul> | <ul style="list-style-type: none"> <li>– Weakened pressure difference → weaker jet stream and more zonal (west–east) storm track</li> <li>– Decreased storminess and below-average precipitation</li> <li>– Below-average temperatures (colder winters)</li> </ul> |
| <b>Spring (Mar–May)</b> | <ul style="list-style-type: none"> <li>– Similar dynamical pattern as winter but less pronounced</li> <li>– Tendency toward slightly wetter and warmer conditions in early spring</li> </ul>                                                                                                                                                 | <ul style="list-style-type: none"> <li>– Reduced storminess relative to NAO+</li> <li>– Tendency toward slightly drier and cooler conditions</li> </ul>                                                                                                            |
| <b>Summer (Jun–Aug)</b> | <ul style="list-style-type: none"> <li>– Generally minimal influence</li> <li>– Slight tendency toward cooler, wetter summers</li> </ul>                                                                                                                                                                                                     | <ul style="list-style-type: none"> <li>– Generally minimal influence</li> <li>– Slight tendency toward warmer, drier summers</li> </ul>                                                                                                                            |
| <b>Autumn (Sep–Nov)</b> | <ul style="list-style-type: none"> <li>– Transitional influence; moderate storminess returns earlier</li> <li>– Above-average rainfall if NAO+ persists into early autumn</li> </ul>                                                                                                                                                         | <ul style="list-style-type: none"> <li>– Delayed onset of Atlantic storms</li> <li>– Below-average rainfall and calmer conditions</li> </ul>                                                                                                                       |

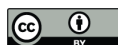

## Appendix B: Wind Speed and Direction by Year

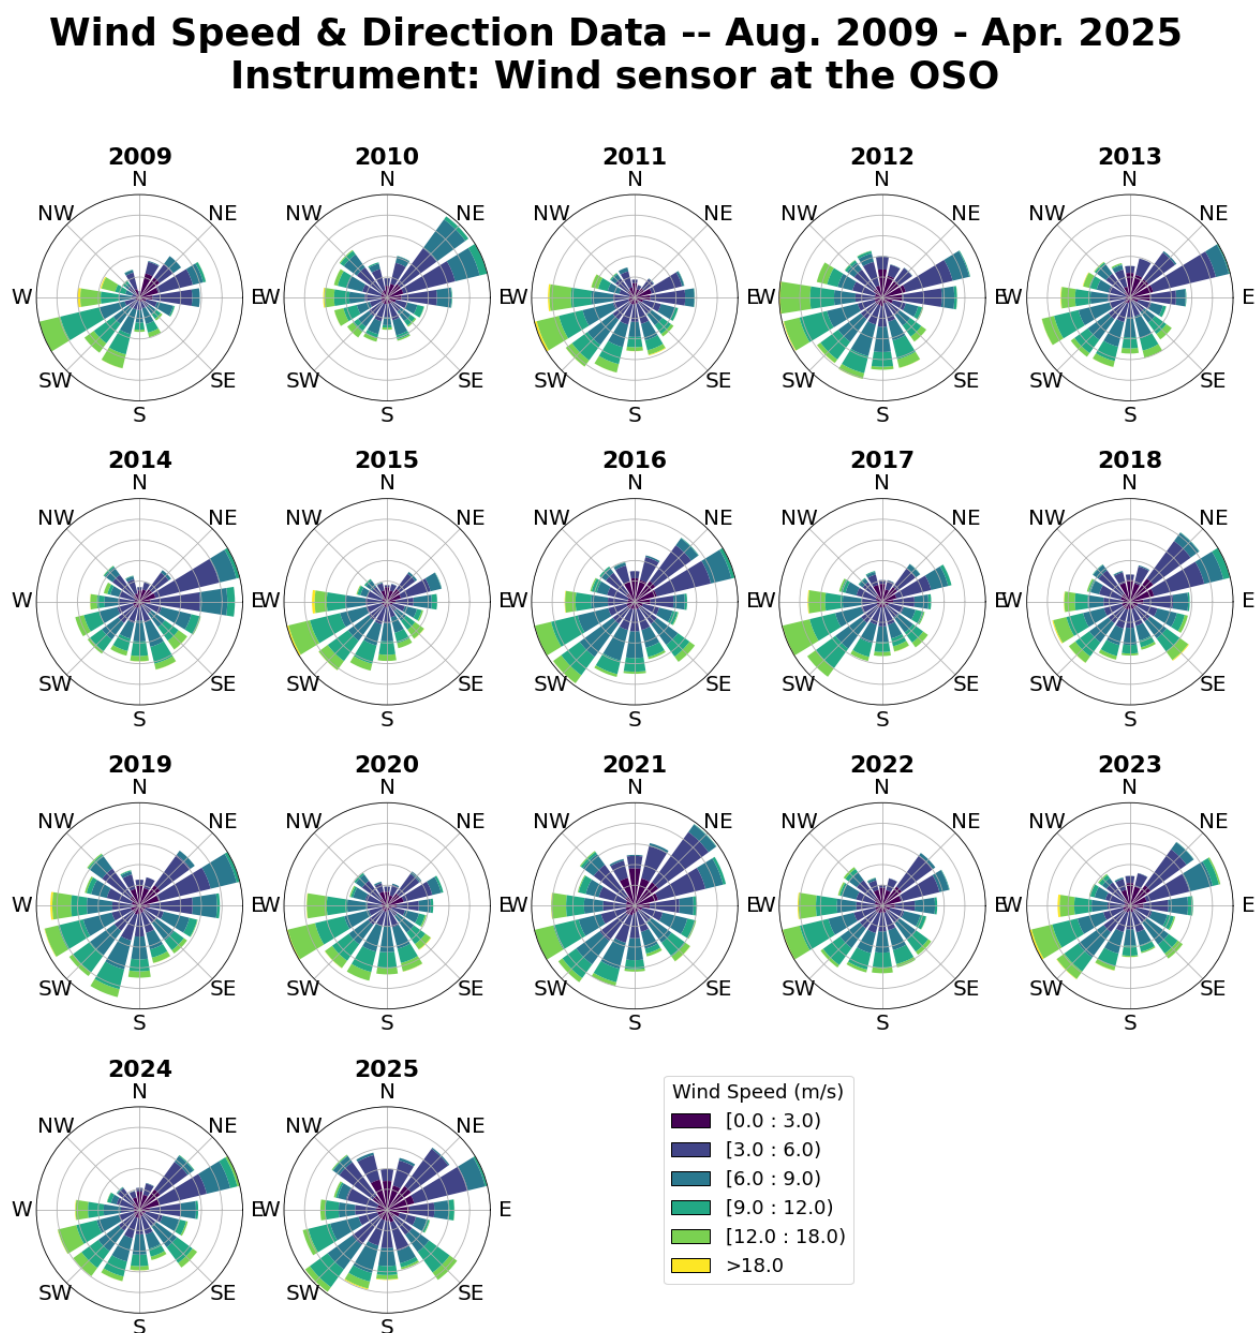

**Figure B1.** Annual wind-rose diagrams depicting the distribution of wind direction and speed from August 2009 to April 2025. Each panel represents one calendar year (2009–2025). Note that 2009 and 2025 are not complete years.



## Appendix C: Inter-annual trends by season

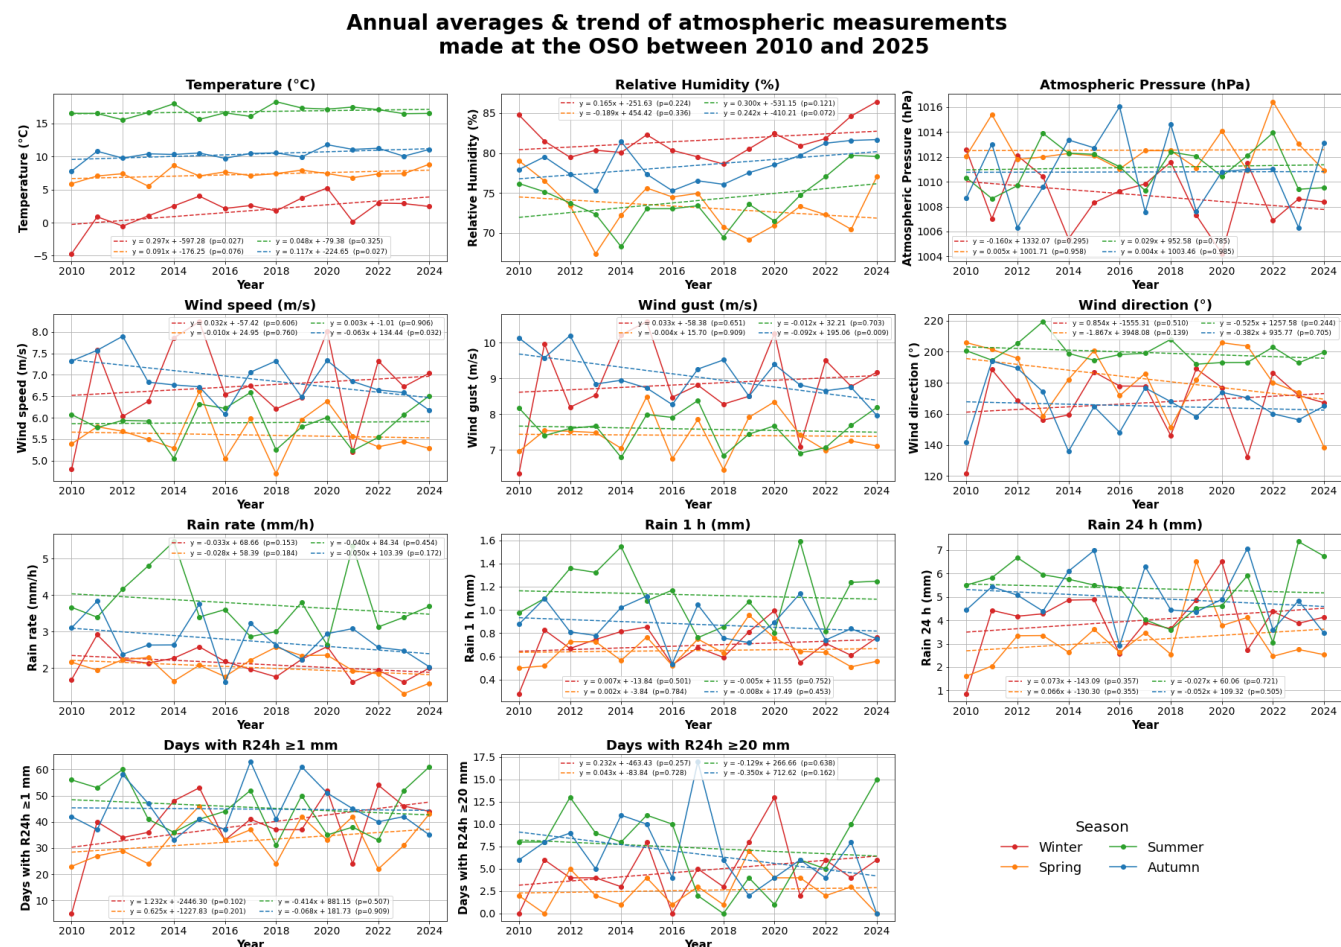

**Figure C1.** Same as Fig.6 but for each season: winter in red, autumn in blue, spring in orange and summer in green.

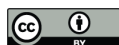

**Table C1.** Linear annual trends (2010–2024), p-value and RMSE from the Fig.C1. Bold font indicates parameters with statistical significance at a 95% confidence level.

| Variable           | Season | Trend                   | p-value      | RMSE        | Variable           | Season | Trend                   | p-value      | RMSE        |
|--------------------|--------|-------------------------|--------------|-------------|--------------------|--------|-------------------------|--------------|-------------|
| Temperature        | Winter | <b>0.297 x -597.28</b>  | <b>0.027</b> | <b>1.86</b> | Humidity           | Winter | 0.165 x -251.63         | 0.224        | 2.01        |
|                    | Spring | 0.091 x -176.25         | 0.076        | 0.74        |                    | Spring | -0.189 x +454.42        | 0.336        | 2.94        |
|                    | Summer | 0.048 x -79.38          | 0.325        | 0.73        |                    | Summer | 0.300 x -531.15         | 0.121        | 2.82        |
|                    | Autumn | <b>0.117 x -224.65</b>  | <b>0.027</b> | <b>0.73</b> |                    | Autumn | 0.242 x -410.21         | 0.072        | 1.93        |
| Pressure           | Winter | -0.160 x +1332.07       | 0.295        | 2.29        | Wind Gust          | Winter | 0.032 x -57.42          | 0.606        | 0.94        |
|                    | Spring | -0.005 x +1001.71       | 0.958        | 1.57        |                    | Spring | -0.01 x +24.95          | 0.760        | 0.48        |
|                    | Summer | 0.029 x +952.58         | 0.785        | 1.62        |                    | Summer | 0.003 x +1.01           | 0.906        | 0.44        |
|                    | Autumn | 0.004 x +1003.46        | 0.985        | 2.93        |                    | Autumn | <b>-0.063 x +134.44</b> | <b>0.032</b> | <b>0.41</b> |
| Wind Gust          | Winter | 0.033 x -58.38          | 0.651        | 1.12        | Wind Speed         | Winter | 0.032 x -57.42          | 0.606        | 0.94        |
|                    | Spring | -0.004 x +15.70         | 0.909        | 0.55        |                    | Spring | -0.01 x +24.95          | 0.760        | 0.48        |
|                    | Summer | -0.012 x +32.21         | 0.703        | 0.49        |                    | Summer | 0.003 x +1.01           | 0.906        | 0.44        |
|                    | Autumn | <b>-0.092 x +195.06</b> | <b>0.009</b> | <b>0.47</b> |                    | Autumn | <b>-0.063 x +134.44</b> | <b>0.032</b> | <b>0.41</b> |
| Wind Direction     | Winter | 0.854 x -1555.31        | 0.510        | 19.62       | Rain 1h            | Winter | 0.007 x -13.84          | 0.501        | 0.16        |
|                    | Spring | -1.867 x +3948.08       | 0.139        | 18.45       |                    | Spring | 0.002 x -3.84           | 0.784        | 0.12        |
|                    | Summer | -0.525 x +1257.58       | 0.244        | 6.69        |                    | Summer | -0.005 x +11.55         | 0.752        | 0.25        |
|                    | Autumn | -0.382 x +935.77        | 0.705        | 15.37       |                    | Autumn | -0.008 x +17.49         | 0.453        | 0.17        |
| Rain Rate          | Winter | -0.033 x +68.66         | 0.153        | 0.34        | Rain 24h           | Winter | 0.073 x -143.09         | 0.357        | 1.19        |
|                    | Spring | -0.028 x +58.39         | 0.184        | 0.31        |                    | Spring | 0.066 x -130.30         | 0.355        | 1.07        |
|                    | Summer | -0.04 x +84.34          | 0.454        | 0.81        |                    | Summer | -0.027 x +60.06         | 0.721        | 1.16        |
|                    | Autumn | -0.05 x +103.39         | 0.172        | 0.54        |                    | Autumn | -0.052 x +109.32        | 0.505        | 1.18        |
| Heavy Precip. Days | Winter | 0.232 x -463.43         | 0.257        | 3.05        | Meas. Precip. Days | Winter | 1.232 x -2446.3         | 0.102        | 10.91       |
|                    | Spring | 0.043 x -83.84          | 0.728        | 1.88        |                    | Spring | 0.625 x -1227.83        | 0.201        | 7.23        |
|                    | Summer | -0.129 x +266.66        | 0.638        | 4.15        |                    | Summer | -0.414 x +881.15        | 0.507        | 9.45        |
|                    | Autumn | -0.350 x +712.62        | 0.162        | 3.68        |                    | Autumn | -0.068 x +181.73        | 0.909        | 9.07        |



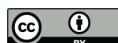

## 360 References

- Busuioc, A., Chen, D., and and, C. H.: Temporal and spatial variability of precipitation in Sweden and its link with the large-scale atmospheric circulation, *Tellus A: Dynamic Meteorology and Oceanography*, 53, 348–367, <https://doi.org/10.3402/tellusa.v53i3.12193>, 2001.
- Chapman, S. and Lindzen, R. S.: *Quantitative Theory of Atmospheric Tides and Thermal Tides*, pp. 106–174, Springer Netherlands, Dordrecht, ISBN 978-94-010-3399-2, [https://doi.org/10.1007/978-94-010-3399-2\\_4](https://doi.org/10.1007/978-94-010-3399-2_4), 1970.
- 365 Chen, D.: A monthly circulation climatology for Sweden and its application to a winter temperature case study, *International Journal of Climatology*, 20, 1067–1076, [https://doi.org/https://doi.org/10.1002/1097-0088\(200008\)20:10<1067::AID-JOC528>3.0.CO;2-Q](https://doi.org/https://doi.org/10.1002/1097-0088(200008)20:10<1067::AID-JOC528>3.0.CO;2-Q), 2000.
- Dankers, R., Hiederer, R., et al.: *Extreme Temperatures and Precipitation in Europe: Analysis of a High-Resolution Climate Change Scenario*, Citeseer, 2008.
- Deser, C., Hurrell, J. W., and Phillips, A. S.: The role of the North Atlantic Oscillation in European climate projections, *Climate Dynamics*,  
 370 49, 3141–3157, <https://doi.org/10.1007/s00382-016-3502-z>, 2017.
- Donat, M., Peterson, T., Brunet, M., King, A., Almazroui, M., Kolli, R., Bouché, D., Al-Mulla, A. Y., Nour, A. Y., Aly, A. A., et al.: Changes in extreme temperature and precipitation in the Arab region: long-term trends and variability related to ENSO and NAO, *International Journal of Climatology*, 34, 581–592, 2014.
- Donat, M. G., Leckebusch, G. C., Pinto, J. G., and Ulbrich, U.: Examination of wind storms over Central Europe with respect to circulation  
 375 weather types and NAO phases, *International Journal of Climatology*, 30, 1289–1300, <https://doi.org/https://doi.org/10.1002/joc.1982>, 2010.
- Douville, H., K.Raghavan, Renwick, J., Allan, R., Arias, P., Barlow, M., Cerezo-Mota, R., Cherchi, A., Gan, T., Gergis, J., Jiang, D., Khan, A., Mba, W. P., Rosenfeld, D., Tierney, J., and Zolina, O.: Water Cycle Changes. In *Climate Change 2021: The Physical Science Basis. Contribution of Working Group I to the Sixth Assessment Report of the Intergovernmental Panel on Climate Change* [Masson-Delmotte, V., P. Zhai, A. Pirani, S.L. Connors, C. Péan, S. Berger, N. Caud, Y. Chen, L. Goldfarb, M.I.Gomis, M. Huang, K. Leitzell, E. Lonnoy, J.B.R. Matthews, T.K. Maycock, T. Waterfield, O. Yelekçi, R. Yu, and B. Zhou (eds.)], <https://doi.org/10.1017/9781009157896.010>, 2021.
- 380 Haas, R., Varenus, E., Handirk, R., Le Bail, K., Diamantidis, P.-K., Nilsson, T., Elgered, G., Feng, P., Mouyen, M., and Scherneck, H.-G.: Onsala Space Observatory–IVS Analysis Center Activities During 2021–2022, *International VLBI Service for Geodesy and Astrometry 2021+ 2022 Biennial Report*, p. 241, 2023.
- 385 Haurwitz, B. and Cowley, A. D.: The diurnal and semidiurnal barometric oscillations global distribution and annual variation, *pure and applied geophysics*, 102, 193–222, 1973.
- Hurrell, J. W.: Decadal Trends in the North Atlantic Oscillation: Regional Temperatures and Precipitation, *Science*, 269, 676–679, <https://doi.org/10.1126/science.269.5224.676>, 1995.
- Hurrell, J. W. and Loon, H. V.: Decadal Variations in Climate Associated with the North Atlantic Oscillation, *Climatic Change*, 36, 301–326,  
 390 <https://doi.org/10.1023/A:1005314315270>, 1997.
- Iles, C. and Hegerl, G.: Role of the North Atlantic Oscillation in decadal temperature trends, *Environmental Research Letters*, 12, 114 010, <https://doi.org/10.1088/1748-9326/aa9152>, 2017.
- Le Blancq, F.: Diurnal pressure variation: the atmospheric tide, *Weather*, 66, 306–307, 2011.
- Lepy, E. and Pasanen, L.: Observed Regional Climate Variability during the Last 50 Years in Reindeer Herding Cooperatives of Finnish Fell  
 395 Lapland, *Climate*, 5, <https://doi.org/10.3390/cli5040081>, 2017.

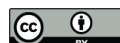

- Mascaut, F., Hammargren, R., and Forkman, P.: Ground-based meteorological measurements at the Onsala Space Observatory (Sweden) between 2009 and 2025, <https://doi.org/10.1594/PANGAEA.984087>, [dataset], 2025a.
- Mascaut, F., Hammargren, R., and Forkman, P.: Ground-based atmospheric solar radiation measurements at the Onsala Space Observatory (Sweden) between 2009 and 2025, <https://doi.org/10.1594/PANGAEA.984085>, [dataset], 2025b.
- 400 Ménard, C. B., Essery, R., Barr, A., Bartlett, P., Derry, J., Dumont, M., Fierz, C., Kim, H., Kontu, A., Lejeune, Y., Marks, D., Niwano, M., Raleigh, M., Wang, L., and Wever, N.: Meteorological and evaluation datasets for snow modelling at 10 reference sites: description of in situ and bias-corrected reanalysis data, *Earth System Science Data*, 11, 865–880, <https://doi.org/10.5194/essd-11-865-2019>, 2019.
- Ning, T. and Elgered, G.: Atmospheric horizontal gradients measured with eight co-located GNSS stations and a microwave radiometer, *Atmospheric Measurement Techniques*, 18, 2069–2082, <https://doi.org/10.5194/amt-18-2069-2025>, 2025.
- 405 on Climate Change (IPCC), I. P.: Framing and Context, p. 49–92, Cambridge University Press, 2022.
- Plauchu-Frayn, I., Colorado, E., Richer, M. G., and Herrera-Vázquez, C.: THIRTEEN YEARS OF WEATHER STATISTICS AT SAN PEDRO MARTIR OBSERVATORY, *Revista Mexicana de Astronomía y Astrofísica*, 56, 295–319, <https://doi.org/10.22201/ia.01851101p.2020.56.02.11>, 2020.
- Pugh, D. T.: Tides, surges and mean sea level, John Wiley and Sons Inc., New York, NY, <https://www.osti.gov/biblio/5061261>, 1987.
- 410 Rimbu, N., Treut, H. L., Janicot, S., Boroneant, C., and Laurent, C.: Decadal precipitation variability over Europe and its relation with surface atmospheric circulation and sea surface temperature, *Quarterly Journal of the Royal Meteorological Society*, 127, 315–329, <https://doi.org/10.1002/qj.49712757204>, 2001.
- Scherneck, H.-G., Rajner, M., and Engfeldt, A.: Superconducting gravimeter and seismometer shedding light on FG5’s offsets, trends and noise: what observations at Onsala Space Observatory can tell us, *Journal of Geodesy*, 94, <https://doi.org/10.1007/s00190-020-01409-0>, 415 2020.
- Siebert, M.: Atmospheric tides, in: *Advances in geophysics*, vol. 7, pp. 105–187, Elsevier, 1961.
- Trenberth, K. E.: Changes in precipitation with climate change, *Climate Research*, 47, 123–138, <https://doi.org/10.3354/cr00953>, 2011.
- Varenus, E., Haas, R., and Nilsson, T.: Short-baseline interferometry local-tie experiments at the Onsala Space Observatory, *Journal of Geodesy*, <https://doi.org/10.1007/s00190-021-01509-5>, 2021.
- 420 Wängberg, I., Nerentorp Mastromonaco, M. G., Munthe, J., and Gårdfeldt, K.: Airborne mercury species at the Råö background monitoring site in Sweden: distribution of mercury as an effect of long-range transport, *Atmospheric Chemistry and Physics*, 16, 13 379–13 387, <https://doi.org/10.5194/acp-16-13379-2016>, 2016.
- Wild, M., Folini, D., Henschel, F., Fischer, N., and Müller, B.: The global energy balance from a surface perspective, *Climate Dynamics*, 44, 3107–3134, <https://doi.org/10.1007/s00382-014-2430-z>, 2015.
